# Supplementary material
Source: PubMed Central journal article supplement (PMC3881610)
Supplement: NIHMS534295-supplement-01.pdf [file NIHMS534295-supplement-01.pdf]

Immunity, Volume 39

## **Supplemental Information**

### **Th9 Cells Drive Host Immunity**

#### **against Gastrointestinal Worm Infection**

**Paula Licona-Limón, Jorge Henao-Mejia, Angela U. Temann, Nicola Gagliani, Heana Licona-Limón, Harumichi Ishigame, Liming Hao, De'Broski R. Herbert, and Richard A. Flavell**

A

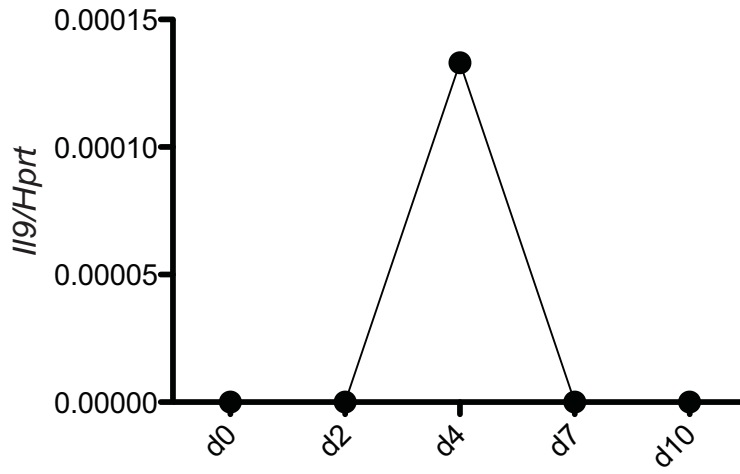

B

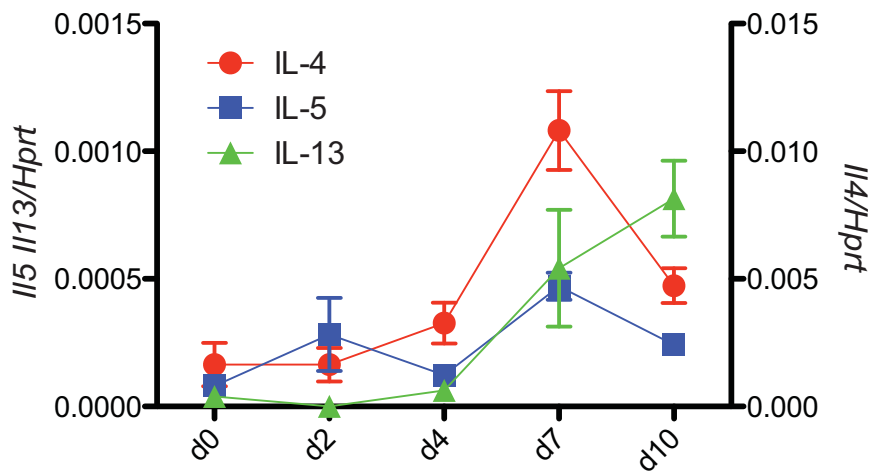

**Figure S1. IL-9 expression precedes IL-4, IL-5 and IL-13 in spleen of *N. brasiliensis* infected mice**

(A) C57BL/6 mice were subcutaneously infected with 625 L3 *N. brasiliensis* larvae. Spleen was collected and homogenized at different days p.i. for assessment of *Il9* mRNA expression by real time RT-PCR. The experiment was performed two times with similar results with 2-3 mice per day p.i. Statistically significant p values were determined by one-way ANOVA when comparing basal expression (d0) with at least one other time point for each gene.

(B) Same samples as above analyzed for *Il4*, *Il5* and *Il13* mRNA expression.

Data represent the mean +/- SEM ratio of cytokine gene to *Hprt* expression as determined by the relative quantification method ( $\Delta\Delta Ct$ ). The experiment was performed two times with similar results with 2-3 mice per day p.i. Statistically significant p values were determined by one-way ANOVA when comparing basal expression (d0) with at least one other time point for each gene.

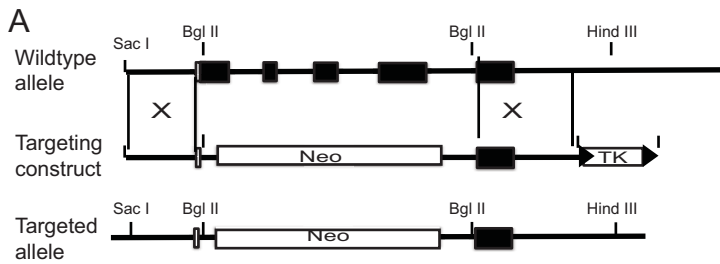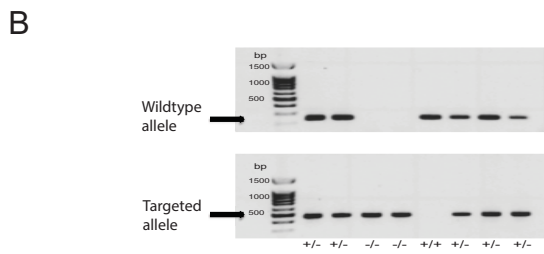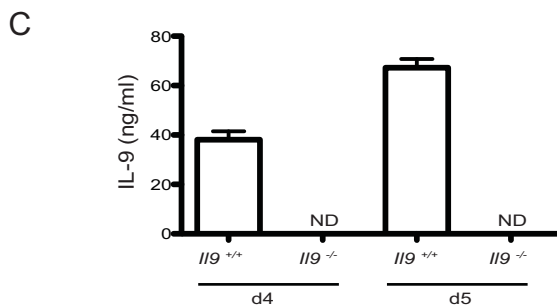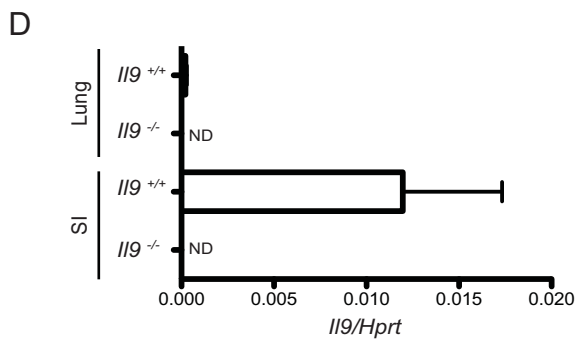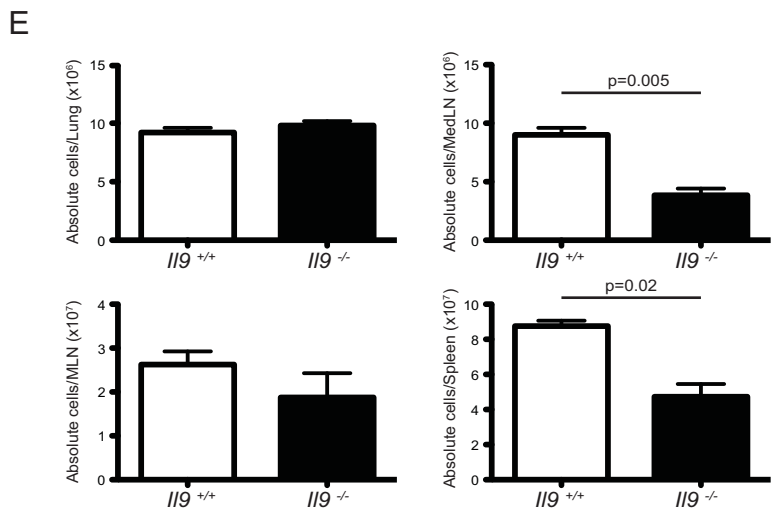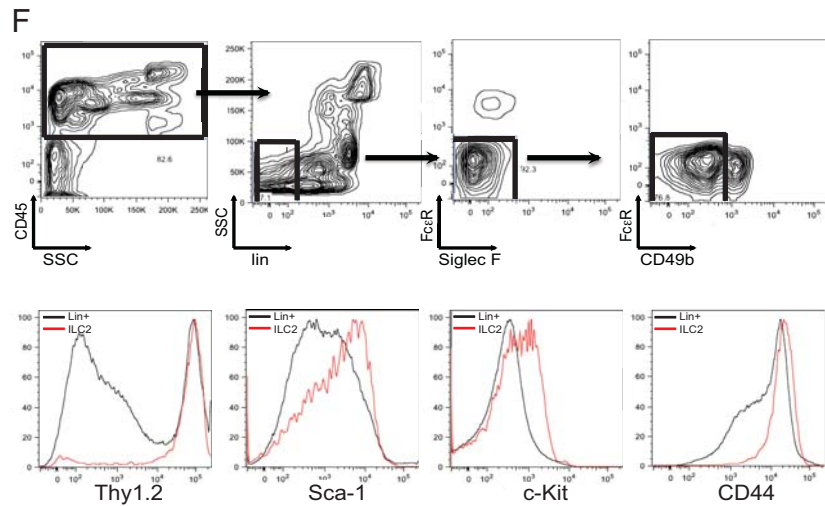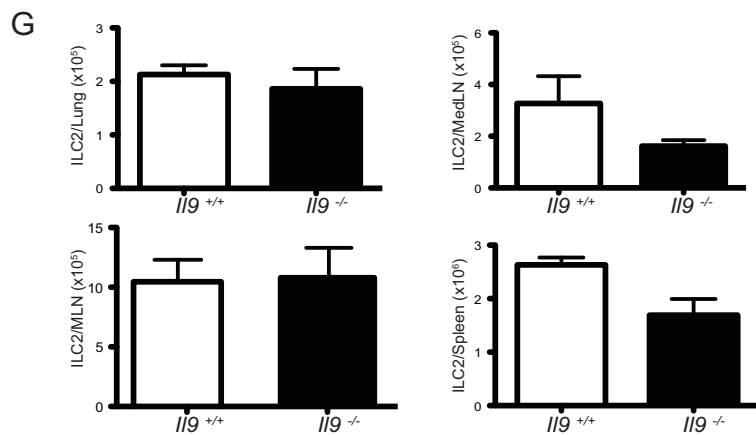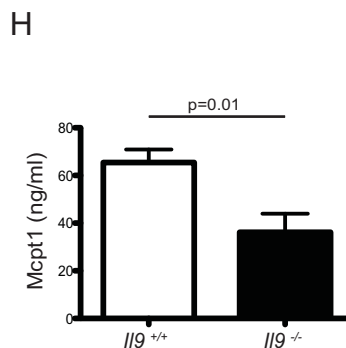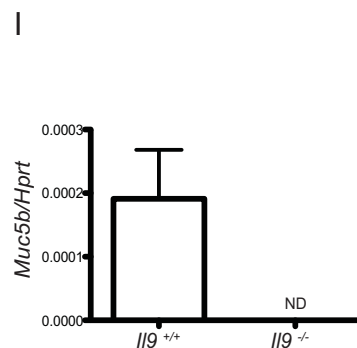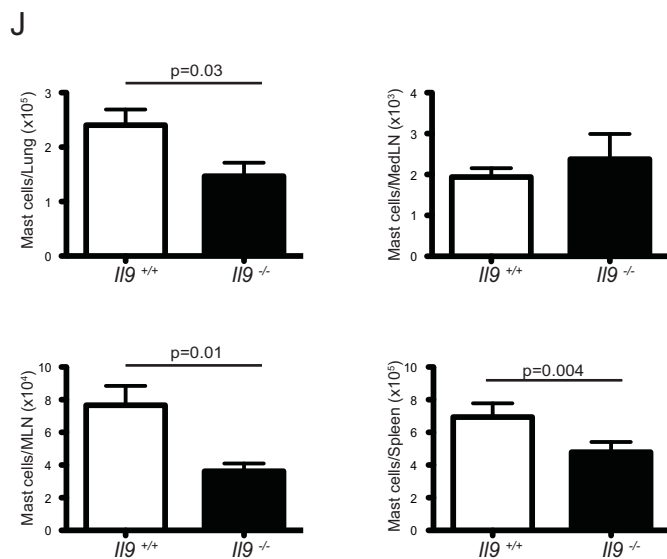

## Figure S2. Generation and characterization of IL-9 deficient mice

(A) Schematic representation of IL-9 wild-type allele, targeting construct and targeted allele. The targeting construct (middle) had a neomycin resistance gene substituting exons 1-4, followed by a loxp-flanked thymidine kinase (TK) downstream of exon 5. Deletion of TK by Cre recombinase resulted in the targeted allele (bottom). Filled boxes represent exons 1-5. Loxp sites are shown as arrow heads. Restriction sites are depicted.

(B) Genotyping of IL-9 deficient mice showing PCR amplification of a 250 bp and 480 bp product corresponding to the IL-9 wild-type (+/+) and targeted (-/-) allele, respectively.

(C) Sorted naïve CD4<sup>+</sup> T cells from *Il9*<sup>+/+</sup> or *Il9*<sup>-/-</sup> mice were polarized *in vitro* in Th9 cultures. IL-9 secretion was determined by ELISA at day 4 and day 5. Data represents mean +/- SEM. The experiment was repeated three times with similar results. ND; not detected.

(D) *Il9*<sup>+/+</sup> or *Il9*<sup>-/-</sup> mice were subcutaneously infected with 625 L3 *N. brasiliensis* larvae. Lung and small intestine was collected and homogenized at day 7 p.i. for assessment of *Il9* mRNA expression by real time RT-PCR. Data represent the mean +/- SEM expression of the cytokine gene to *Hprt* using the  $\Delta\Delta C_t$  method.

(E) Total numbers of cells in lung, MedLN, MLN and spleen of *Il9*<sup>+/+</sup> or *Il9*<sup>-/-</sup> mice at day 7 p.i.

(F) Gating strategy for analysis of ILC2 cells by flow cytometry in *N. brasiliensis* infected mice. Example shown is lung at day 7 p.i. Numbers represent percentage of boxed cells. The lower panels are representative flow cytometry analysis for surface

expression of Thy1.2, Sca-1, c-kit and CD44 in ILC2 cells (red line) and lin<sup>+</sup> cells (black line) from lung infected mice.

(G) Total numbers of ILC2 cells as determined by flow cytometry in lung, medLN, MLN and spleen of *Ilg<sup>+/+</sup>* or *Ilg<sup>-/-</sup>* mice at day 7 p.i.

(H) Serum concentration of Mcpt1 as determined by ELISA in *Ilg<sup>+/+</sup>* (white bars) or *Ilg<sup>-/-</sup>* (black bars) mice at day 7 p.i.

(I) Small intestine from *Ilg<sup>+/+</sup>* (white bars) or *Ilg<sup>-/-</sup>* (black bars) mice was collected and homogenized at day 7 p.i for assessment of *Muc5b* mRNA expression by real time RT-PCR. Data represent the mean +/- SEM expression of mucin to *Hprt* using the  $\Delta\Delta Ct$  method.

(J) Total mast cell (FceRI<sup>+</sup> c-Kit<sup>+</sup>) numbers in lung, medLN, MLN and spleen of *Ilg<sup>+/+</sup>* (white bars) or *Ilg<sup>-/-</sup>* (black bars) at day 7 p.i. Mean +/- SEM of experiments with 6 mice per group.

Density plots and histograms are representative results of six mice per group analyzed. Data are represented as mean +/- SEM. All the experiments were performed twice with similar results. n= 6 mice per group. p value determined by unpaired two-tailed Student's t test is shown. ND; not detected.

A

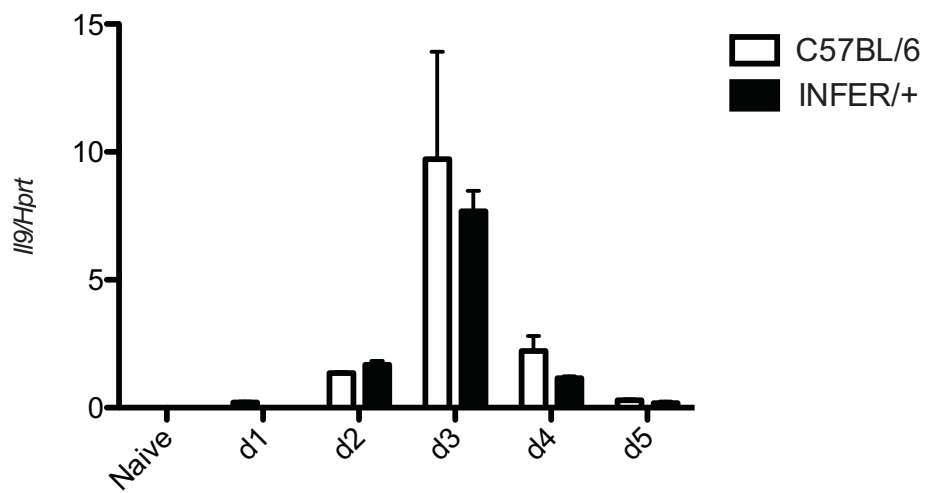

B

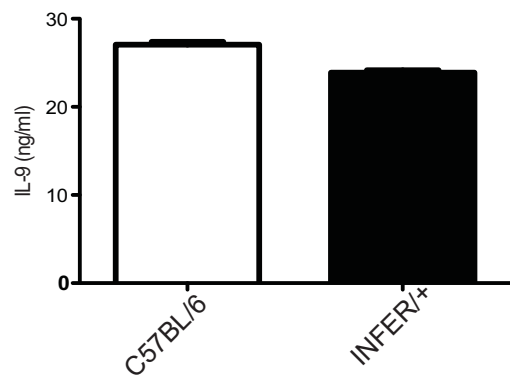

C

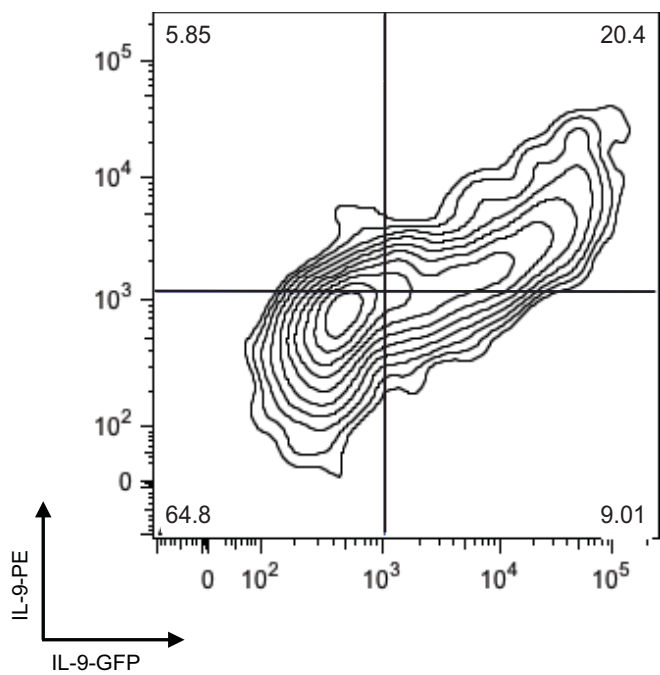

**Figure S3. Validation of INFER mice *in vitro***

(A) Sorted naïve CD4<sup>+</sup>CD62L<sup>+</sup>CD25<sup>-</sup>CD44<sup>-</sup> T cells from wild-type C57BL/6 or INFER/+ mice were cultured in Th9 conditions for 5 days. *Il9* mRNA expression was assessed in samples collected daily by quantitative RT-PCR using the  $\Delta\Delta\text{Ct}$  method. Mean  $\pm$  SEM normalized to *Hprt* from one out of three independent experiments is shown.

(B) Supernatants from cultures in (A) at day 5 were collected and analyzed by ELISA for IL-9 quantification. Mean  $\pm$  SEM from one out of three independent experiments measured in triplicate is shown.

(C) Intracellular staining for IL-9 and GFP expression analyzed by flow cytometry in Th9 cultures from INFER/+ naïve T cells at day 5.



A

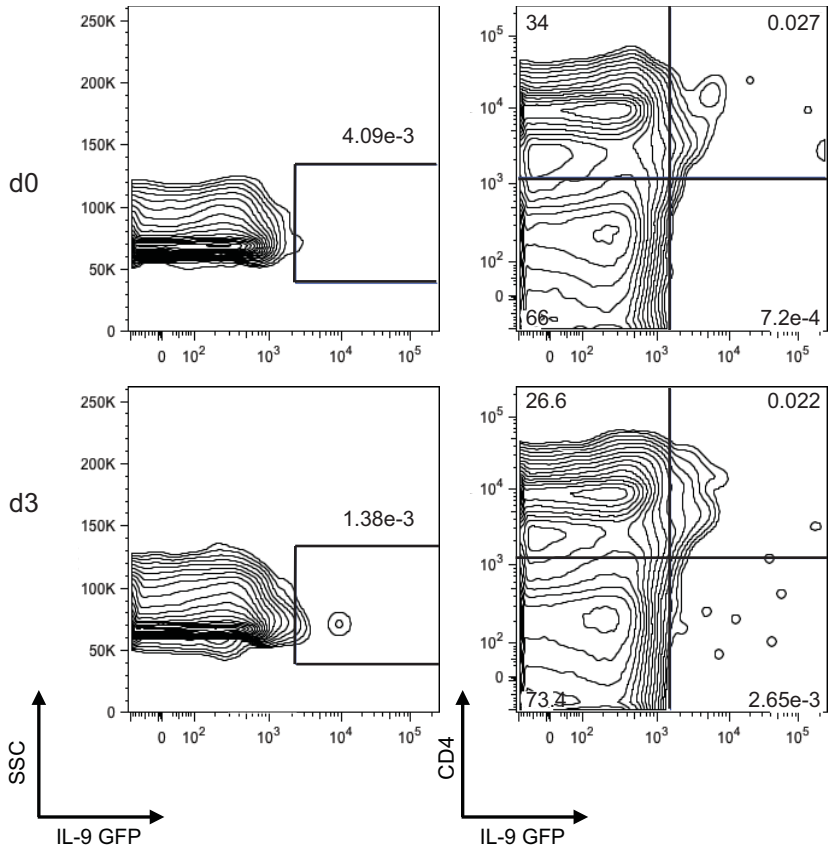

B

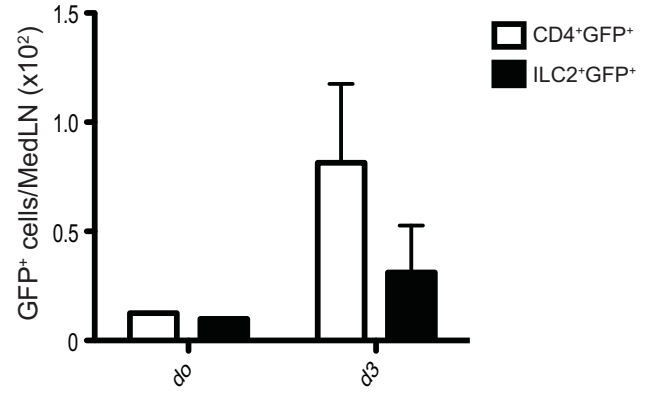

C

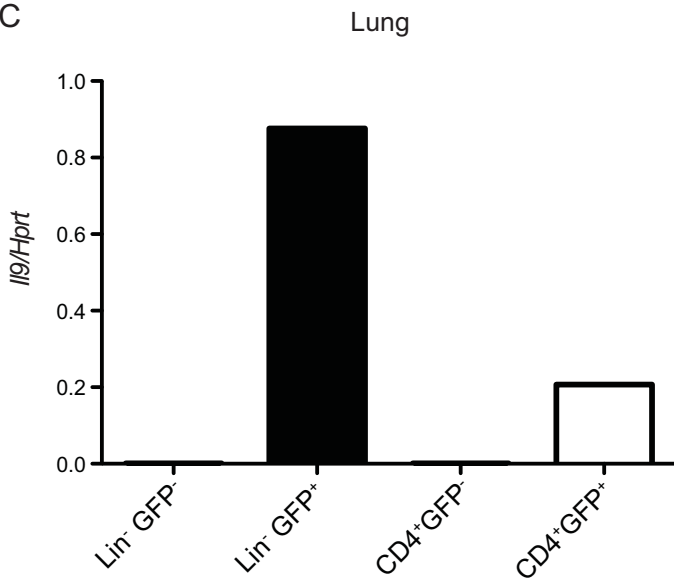

D

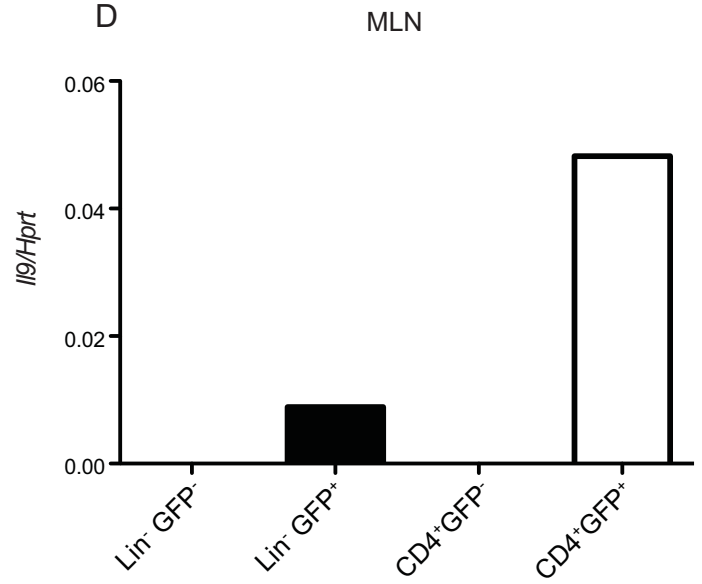

**Figure S4. IL-9 is expressed in GFP<sup>+</sup> cells *in vivo***

INFER mice were subcutaneously infected with 625 L3 *N. brasiliensis* larvae.

(A) MedLN were harvested and homogenized at days 0 and 3 p.i for assessment of IL-9 expression by flow cytometry. Numbers represent the frequencies of total GFP<sup>+</sup> cells (left column) or GFP<sup>+</sup> among CD4<sup>+</sup> T cells (right column).

(B) Total numbers of CD4<sup>+</sup> T cells (white bars) and ILC2 cells (black bars) expressing IL-9 (GFP<sup>+</sup>) in medLN as determined by flow cytometry at days 0 and 3 p.i. Data are represented as mean  $\pm$  SEM from one out of three independent experiments with 3-4 mice per day p.i.

(C-D) CD4<sup>+</sup> GFP<sup>-</sup>, CD4<sup>+</sup> GFP<sup>+</sup>, ILC2 GFP<sup>-</sup> and ILC2 GFP<sup>+</sup> cells, isolated from lung (C) or MLN (D) of INFER infected mice at day 10 p.i. were assessed for *Il9* mRNA expression by quantitative RT-PCR. Data represent ratio of IL-9 to *Hprt* expression by the relative quantification method ( $\Delta\Delta$ Ct). The experiment was repeated three times with similar results using 10 pulled INFER mice.

**A**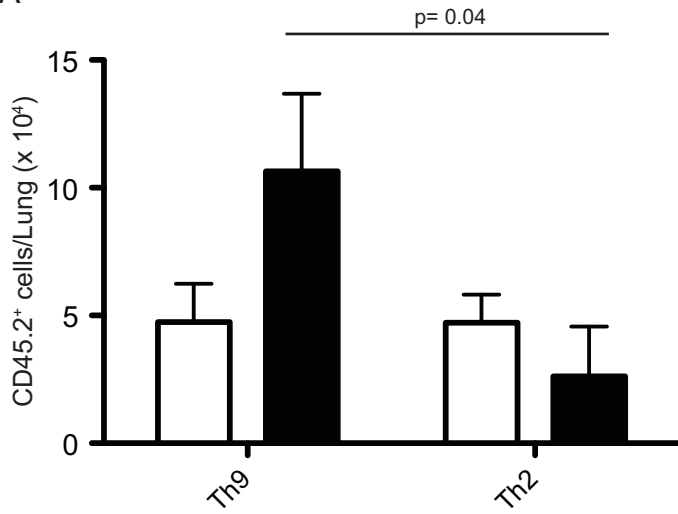**B**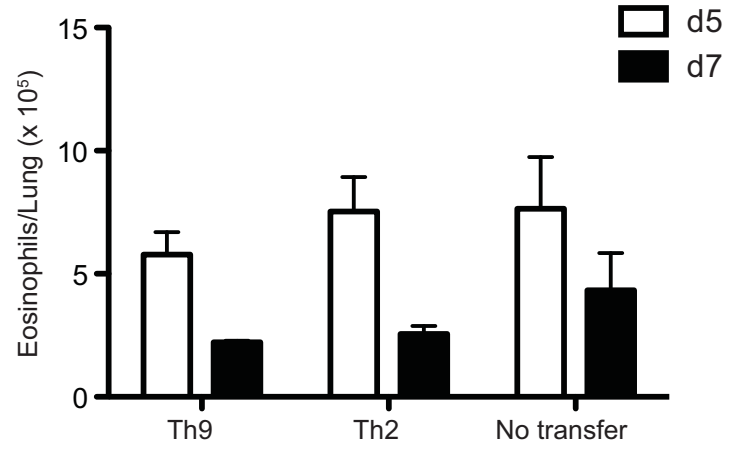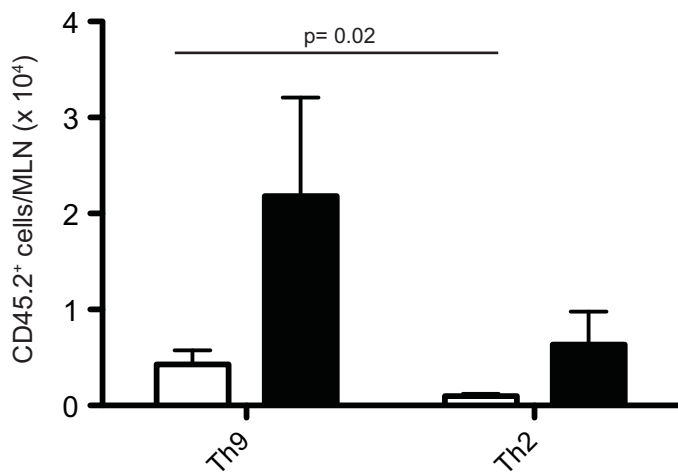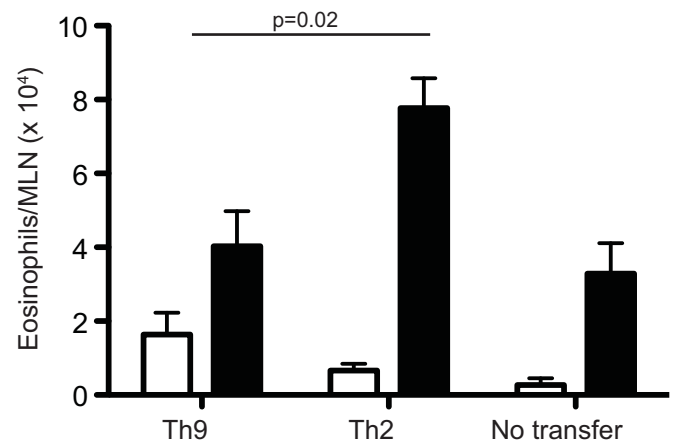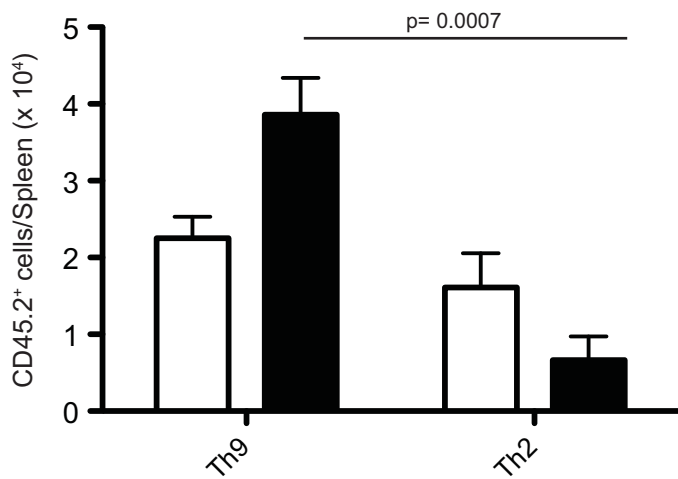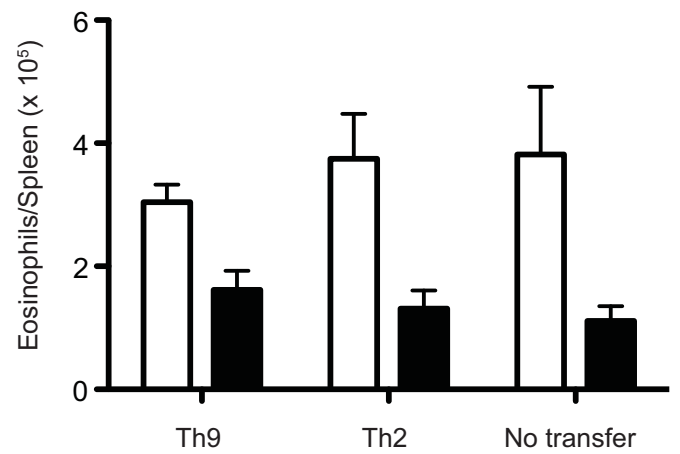

**Figure S5. Donor cells and eosinophil quantification in *Rag2*<sup>-/-</sup> mice adoptively transferred with Th2 or Th9 cells**

(A) Sorted effector Th2 or Th9 ( $2 \times 10^5$ ) cells (CD45.2<sup>+</sup>GFP<sup>+</sup>) from day 5 *in vitro* cultures with naïve CD4<sup>+</sup> T cells isolated from 4get or INFER mice were intravenously transferred into CD45.1<sup>+</sup> *Rag2*<sup>-/-</sup> recipient mice. 24 hrs later, mice were subcutaneously infected with 625 L3 *N. brasiliensis* larvae. Total numbers of transferred Th9 or Th2 cells recovered from lung, MLN, and spleen at day 5 (white bars) and day 7 (black bars) p.i. were determined by flow cytometry (gated on CD45.2<sup>+</sup>).

(B) Total numbers of eosinophils in lung, MLN and spleen of *Rag2*<sup>-/-</sup> mice adoptively transferred with effector Th2 or Th9 ( $2 \times 10^5$ ) cells (CD45.2<sup>+</sup>GFP<sup>+</sup>) at day 5 (white bars) and day 7 (black bars) p.i. As a control a third group of *Rag2*<sup>-/-</sup> mice that did not received T cells was also infected.

Data are represented as mean +/- SEM. The experiment was repeated three times with similar results. n= 4-5 mice per group. Statistics were calculated by unpaired two-tailed Student's t test. The p values between groups are shown.

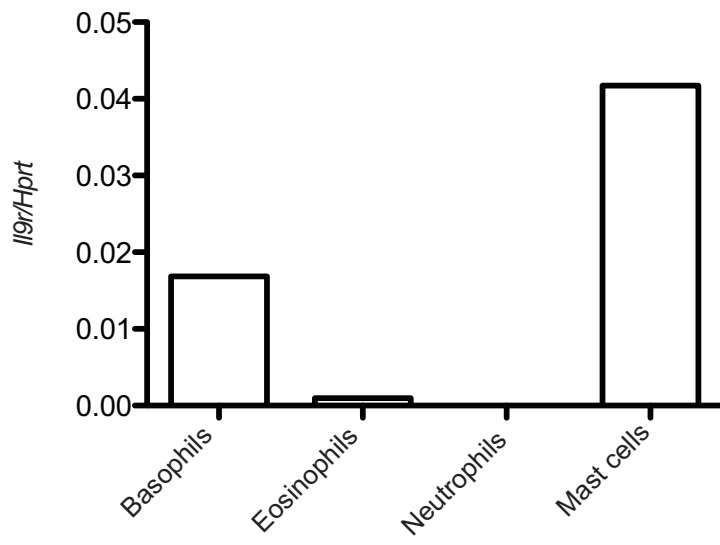

**Figure S6. IL-9R expression in sorted populations from *N. brasiliensis* infected lung**

Sorted eosinophils (CD11b<sup>+</sup> SiglecF<sup>+</sup>), basophils (CD49b<sup>+</sup> FceR<sup>+</sup> c-kit<sup>-</sup>), neutrophils (Ly6G<sup>+</sup>CD11b<sup>+</sup>) and mast cells (FceR<sup>+</sup> c-Kit<sup>+</sup>) from *N. brasiliensis* infected lung at day 7 p.i. were assessed for *Il9r* mRNA expression by real-time RT-PCR. Data represent ratio of *Il9r* to *Hprt* mRNA expression by the relative quantification method ( $\Delta\Delta\text{Ct}$ ). The experiment was repeated twice with similar results using 5 pulled wildtype C57BL/6 mice.
